# Supplementary material for: Gene Expression Profiles of Methyltransferases and Demethylases Associated with Metastasis, Tumor Invasion, CpG73 Methylation, and HPV Status in Head and Neck Squamous Cell Carcinoma
Source: MDPI journal article supplement (doi:10.3390/cimb45060294), 2023-05-27
Supplement: s1 [file s1]

Supplementary information for

**Gene Expression Profiles of Methyltransferases and Demethylases Associated with Metastasis, Tumor Invasion, CpG73 Methylation, and HPV Status in Head and Neck Squamous Cell Carcinoma**

Larisa Goričan <sup>1,†</sup>, Tomaž Büdefeld <sup>1,†</sup>, Helena Čelešnik <sup>1,2</sup>, Matija Švagan <sup>3</sup>,  
Boštjan Lanišnik <sup>3</sup> and Uroš Potočnik <sup>1,2,4,\*</sup>

<sup>1</sup> Centre for Human Genetics and Pharmacogenomics, Faculty of Medicine, University of Maribor, 2000 Maribor, Slovenia; larisa.gorican@um.si (L.G.); tomaz.buedefeld@um.si (T.B.)

<sup>2</sup> Laboratory for Biochemistry, Molecular Biology and Genomics, Faculty of Chemistry and Chemical Engineering, University of Maribor, 2000 Maribor, Slovenia

<sup>3</sup> Department of Otorhinolaryngology, Cervical and Maxillofacial Surgery, University Medical Centre Maribor, Ljubljanska ulica 5, 2000 Maribor, Slovenia

<sup>4</sup> Department for Science and Research, University Medical Centre Maribor, 2000 Maribor, Slovenia

\* Correspondence: uros.potocnik@um.si; Tel.: +386-2-2345-854

† These authors contributed equally to this work.

Content:

Supplementary Figures S1 – S3

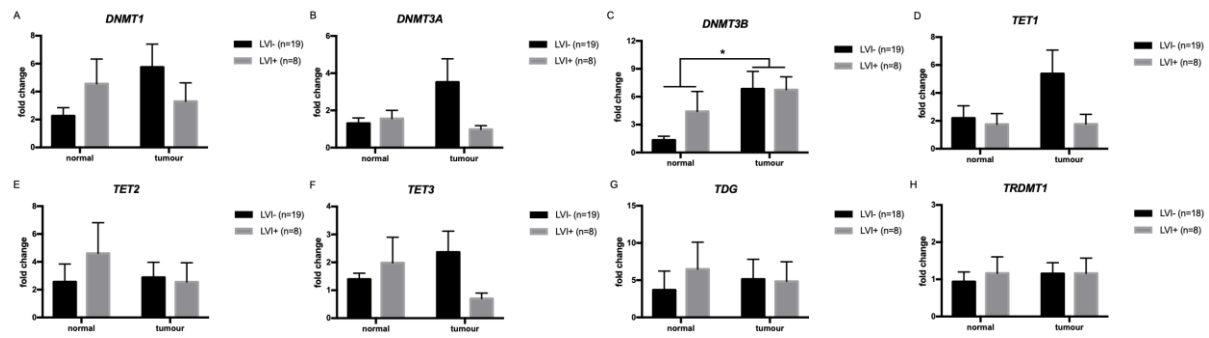

Figure S1: Expression of DNA methyltransferases *DNMT1*, *DNMT3A*, *DNMT3B*, DNA demethylases *TET1*, *TET2*, *TET3* and *TDG* and RNA methyltransferase *TRDMT1* in HNSCC with lymphovascular invasion (LVI+). Differences between groups were examined by two-factor repeated measures ANOVA with tissue type and invasion as independent factors followed by Sidak's multiple comparisons *post hoc* test. The expression of *DNMT3B* was significantly higher in tumour compared to normal tissue irrespective of lymphovascular invasion. For each gene, paired normal tissue corresponding to local tumours (LVI-) was used as a reference. Data are shown as mean  $\pm$  S.E.M., \* $p < 0.05$

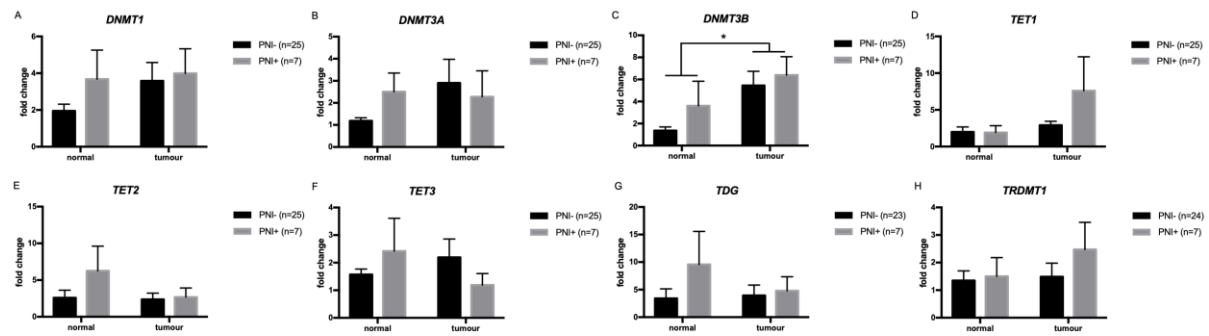

Figure S2: Expression of DNA methyltransferases *DNMT1*, *DNMT3A*, *DNMT3B*, DNA demethylases *TET1*, *TET2*, *TET3* and *TDG* and RNA methyltransferase *TRDMT1* in HNSCC with perineural invasion (PNI+). Differences between groups were examined by two-factor repeated measures ANOVA with tissue type and invasion as independent factors, followed by Sidak's multiple comparisons *post hoc* test. The expression of *DNMT3B* was significantly higher in tumour compared to normal tissue irrespective of perineural invasion. For each gene, paired normal tissue corresponding to local tumours (PNI-) was used as a reference. Data are shown as mean  $\pm$  S.E.M., \* $p < 0.05$ .

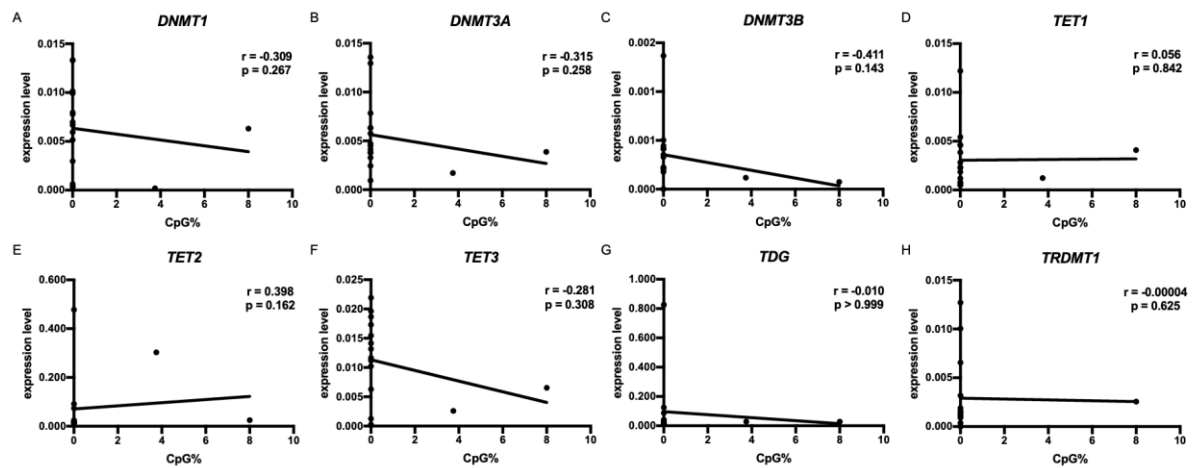

Figure S3: Correlation between CpG73 methylation and mRNA expression of DNA methyltransferases *DNMT1*, *DNMT3A* and *DNMT3B*, DNA demethylases *TET1*, *TET2*, *TET3* and *TDG*, and RNA methyltransferase *TRDMT1* in normal tissue. Outliers were removed using Nalimov test ( $\alpha = 0.05$ ) and the correlation between the gene expression and level of CpG73 methylation was analysed by Spearman's rank-order correlation.  $r$  = Spearman's rank correlation coefficient, for all genes:  $n=18$ .
